# Supplementary material
Source: Royal Society of Chemistry journal article supplement (doi:10.1039/d6tc00742b)
Supplement: d6tc00742b1.pdf [file d6tc00742b1.pdf]

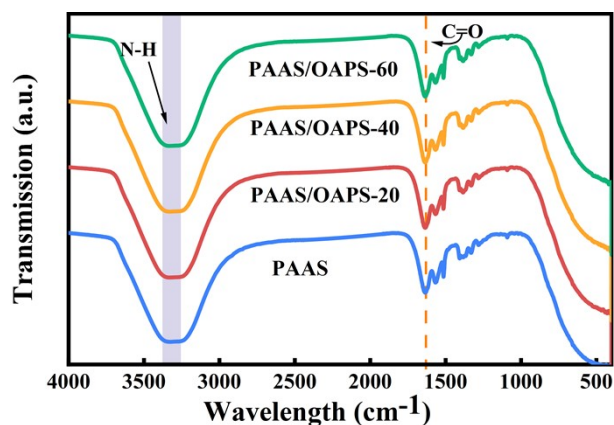

Fig. S3 FTIR spectra of PAAS and PAAS/OAPS-n

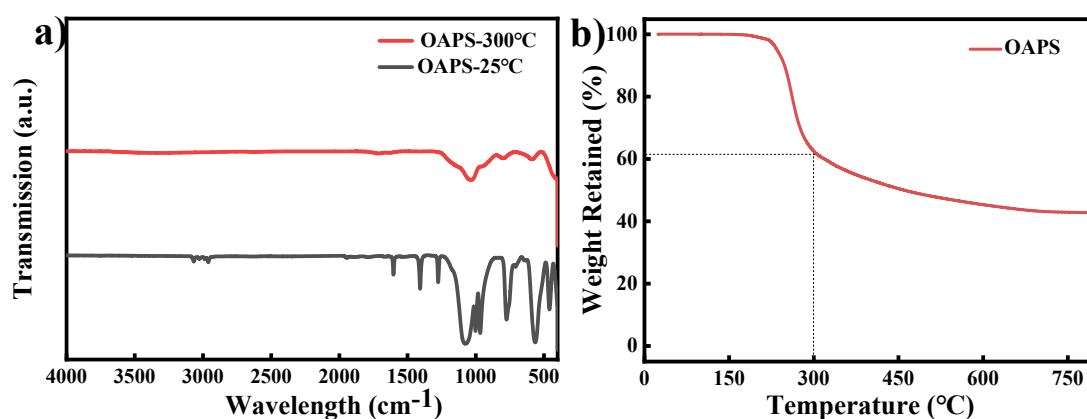

Fig. S4 a) FTIR spectra of OAPS and OAPS after thermal treatment; b) TGA of OAPS

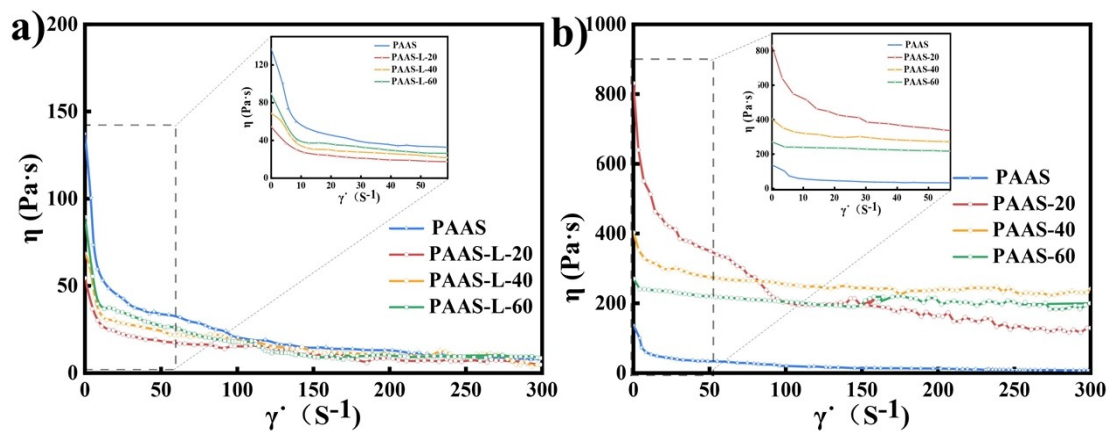

Fig. S5 rheological characterizations: a) Linear PAAS; b) OAPS-containing PAAS

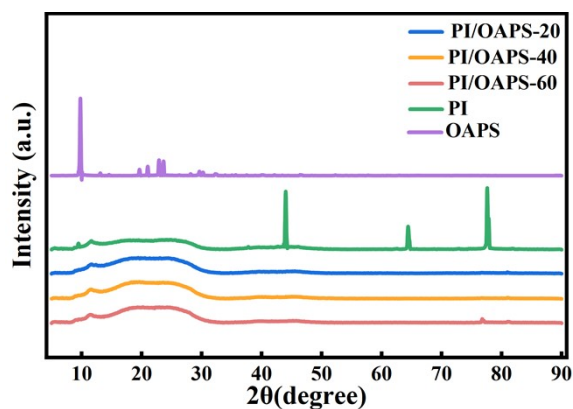

Fig. S6 XRD patterns of PI and PI/OAPS-n

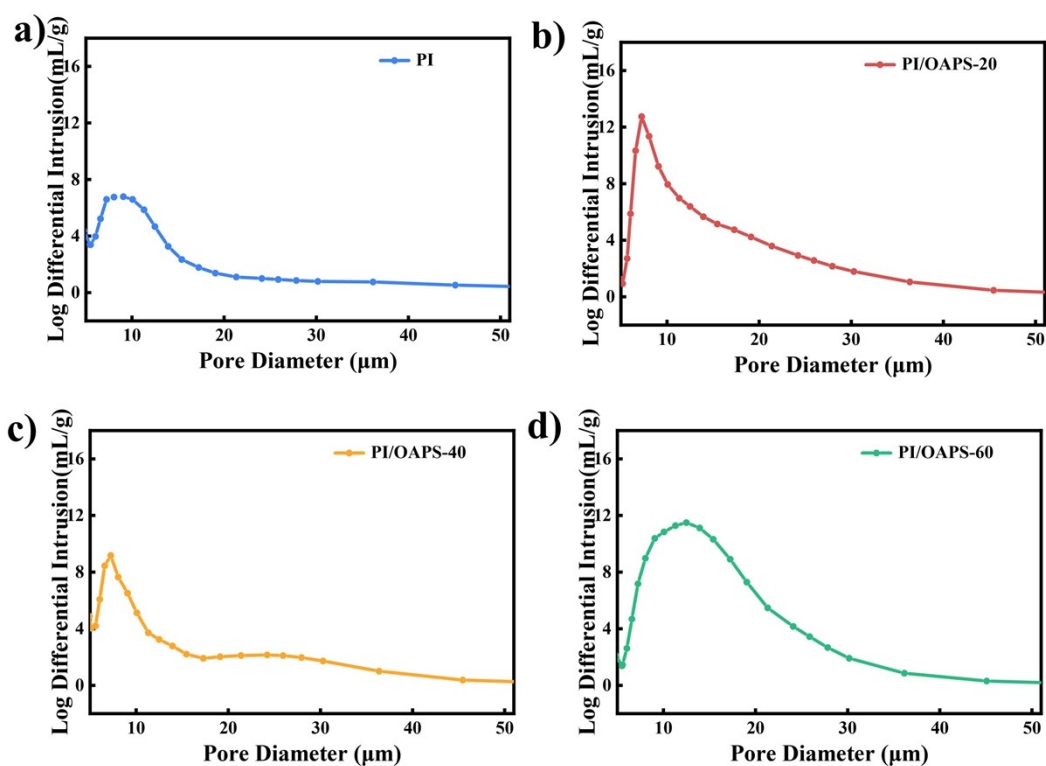

Fig. S7 Pore size distribution plots of PI and PI/OAPS-n

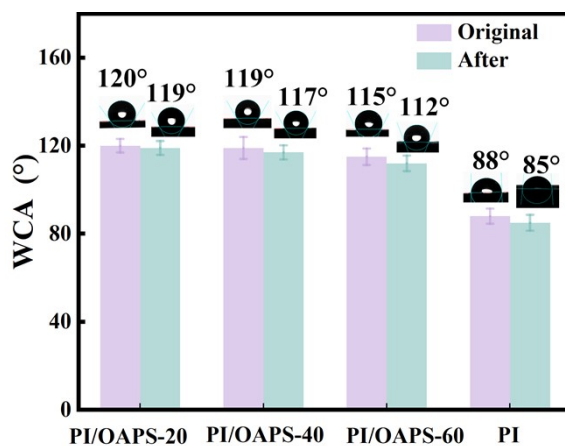

Fig. S8 Contact angles of PI and PI/OAPS-n before and after damp-heat aging at

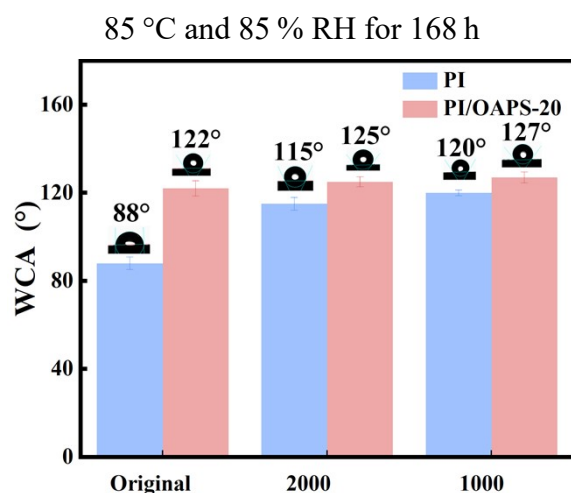

**Fig. S9** Contact angles of PI and PI/OAPS-20 before and after sanding with sandpapers of different grit sizes.

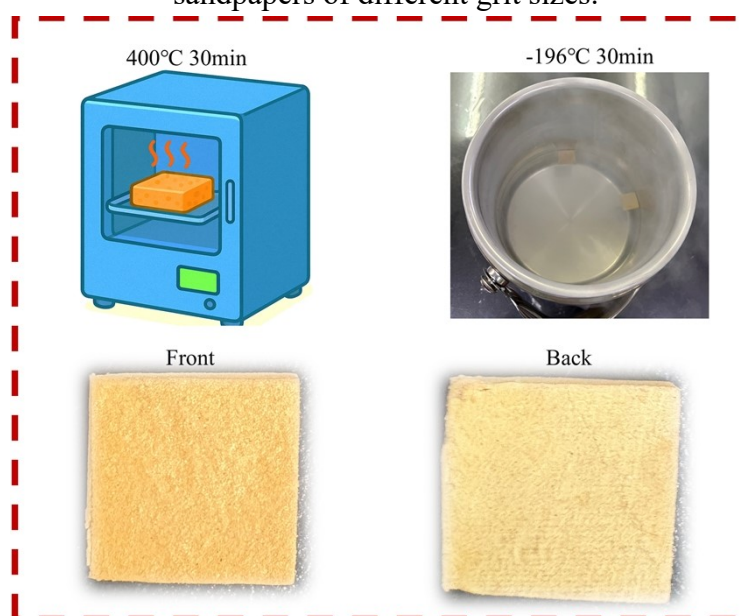

**Fig. S10** Macroscopic structure of the PI/OAPS-20 aerogel following thermal shock tests

**Table 1** Physical Properties of PI and PI/OAPS-n

| Sample     | Shrinkage Rate (%) | Density (g/cm <sup>3</sup> ) | Porosity (%) |
|------------|--------------------|------------------------------|--------------|
| PI/OAPS-20 | 22.4±0.433         | 0.128±0.003                  | 90.541±0.282 |
| PI/OAPS-40 | 22.7±0.358         | 0.131±0.005                  | 90.017±0.905 |
| PI/OAPS-60 | 23.2±0.426         | 0.133±0.003                  | 89.340±0.327 |
| PI         | 32.9±0.460         | 0.142±0.003                  | 88.628±0.400 |

**Table 2:** Pore structure parameters of the PI and PI/OAPS-n by MIP.

| Sample | Median pore | Mode pore | Total pore area |
|--------|-------------|-----------|-----------------|
|--------|-------------|-----------|-----------------|

|            | diameter(volume) ( $\mu\text{m}$ ) | diameter( $\mu\text{m}$ ) | ( $\text{m}^2/\text{g}$ ) |
|------------|------------------------------------|---------------------------|---------------------------|
| PI/OAPS-20 | 7.737                              | 7.176                     | 14.681                    |
| PI/OAPS-40 | 6.117                              | 7.168                     | 14.196                    |
| PI/OAPS-60 | 10.178                             | 12.52                     | 9.371                     |
| PI         | 6.182                              | 8.655                     | 11.396                    |

**Table 3** Physical Properties of PI and PI/OAPS-n of different batches

| Sample     | Shrinkage Rate (%) | Density ( $\text{g}/\text{cm}^3$ ) | Porosity (%)       |
|------------|--------------------|------------------------------------|--------------------|
| PI/OAPS-20 | 22.7 $\pm$ 0.465   | 0.128 $\pm$ 0.002                  | 91.127 $\pm$ 0.328 |
| PI/OAPS-40 | 23.5 $\pm$ 0.384   | 0.131 $\pm$ 0.004                  | 90.674 $\pm$ 0.781 |
| PI/OAPS-60 | 24.3 $\pm$ 0.436   | 0.133 $\pm$ 0.004                  | 89.749 $\pm$ 0.379 |
| PI         | 33.8 $\pm$ 0.453   | 0.142 $\pm$ 0.002                  | 88.870 $\pm$ 0.448 |

**Table 4** Physical Properties of PI and PI/OAPS-n of different batches

| Sample     | Shrinkage Rate (%) | Density ( $\text{g}/\text{cm}^3$ ) | Porosity (%)       |
|------------|--------------------|------------------------------------|--------------------|
| PI/OAPS-20 | 21.8 $\pm$ 0.447   | 0.128 $\pm$ 0.003                  | 90.269 $\pm$ 0.369 |
| PI/OAPS-40 | 22.4 $\pm$ 0.369   | 0.131 $\pm$ 0.002                  | 89.866 $\pm$ 0.514 |
| PI/OAPS-60 | 23.0 $\pm$ 0.411   | 0.133 $\pm$ 0.003                  | 89.111 $\pm$ 0.398 |
| PI         | 32.3 $\pm$ 0.472   | 0.142 $\pm$ 0.004                  | 88.158 $\pm$ 0.377 |

**Table 5** Thermal, mechanical, surface, and dielectric properties of PI and PI/OAPS-n

| Sample     | Storage                         |                                       |                            | Contact Angle ( $^\circ$ ) | Dielectric Constant $D_k$ | Dielectric Loss $D_f(\times 10^{-3})$ |
|------------|---------------------------------|---------------------------------------|----------------------------|----------------------------|---------------------------|---------------------------------------|
|            | $T_{d5\%}$ ( $^\circ\text{C}$ ) | Modulus ( $E'$ ) ( $^\circ\text{C}$ ) | $T_g$ ( $^\circ\text{C}$ ) |                            |                           |                                       |
| PI/OAPS-20 | 602                             | 187.90                                | 332.08                     | 120.02                     | 1.08 $\pm$ 0.005          | 1.28 $\pm$ 0.132                      |
| PI/OAPS-40 | 592                             | 197.65                                | 331.11                     | 118.64                     | 1.10 $\pm$ 0.00           | 1.12 $\pm$ 0.013                      |

|            |     |        |        |        |           |            |
|------------|-----|--------|--------|--------|-----------|------------|
|            |     |        |        |        | 3         |            |
| PI/OAPS-60 | 603 | 162.95 | 350.98 | 114.65 | 1.11±0.00 | 1.37±0.071 |
|            |     |        |        |        | 3         |            |
| PI         | 597 | 150.12 | 352.35 | 87.63  | 1.24±0.00 | 3.12±0.24  |
|            |     |        |        |        | 9         |            |

**Table 6** Thermal, mechanical, surface, and dielectric properties of PI and PI/OAPS-n of different batches

| Sample     | Dielectric | Dielectric            | Dielectric | Dielectric            |
|------------|------------|-----------------------|------------|-----------------------|
|            | Constant 2 | Loss 2                | Constant 3 | Loss 3                |
|            | $D_k$      | $D_f(\times 10^{-3})$ | $D_k$      | $D_f(\times 10^{-3})$ |
| PI/OAPS-20 | 1.08±0.004 | 1.46±0.112            | 1.09±0.006 | 1.18±0.29             |
| PI/OAPS-40 | 1.10±0.003 | 1.79±0.0143           | 1.11±0.004 | 1.19±0.28             |
| PI/OAPS-60 | 1.11±0.004 | 1.88±0.111            | 1.11±0.005 | 1.42±0.12             |
| PI         | 1.25±0.006 | 3.67±0.26             | 1.22±0.006 | 3.53±0.15             |
